# Supplementary material for: Norovirus Infection in Young Nicaraguan Children Induces Durable and Genotype-Specific Antibody Immunity
Source: MDPI journal article supplement (doi:10.3390/v14092053), 2022-09-16
Supplement: s1 [file s1]

### Supplemental Data

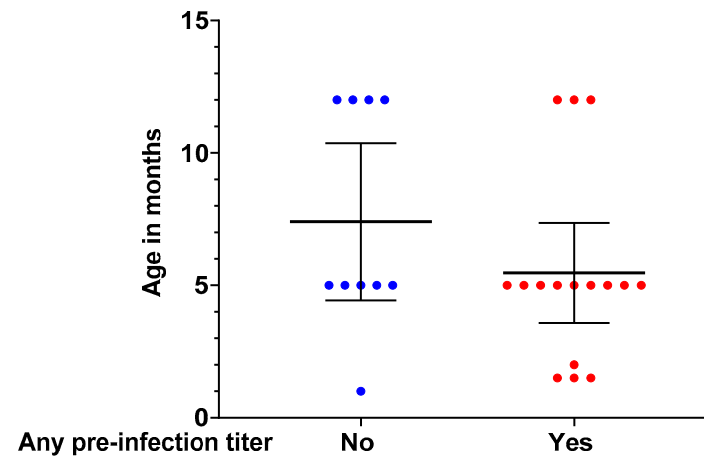

**Figure S1. Age does not associate with pre-infection serum blockade antibody seroprevalence in this cohort.** Children were stratified by detectable levels of pre-infection blockade antibody titer and age. Age at sample collection was not different between children with and without pre-infection blockade antibody titer (Mann-Whitney test,  $p = 0.26$ ). Marker, one child. Line and error bars; mean and 95% CI. Y axis; age in months.

**Table S1. Summary metrics to genogroup II human norovirus strains among the child cohort.**

| A<br>Subject<br>number | B<br>Age at pre-<br>blood draw<br>months | C     |               |       |       |               |       |       |                     |       |       |                    |       |       |                |       |       |                |        |       |                |       | RT-qPCR   | Seroconverted<br>to infecting<br>genotype | Serology matches<br>asymptomatic-<br>symptomatic PCR | Pre infection<br>titers |
|------------------------|------------------------------------------|-------|---------------|-------|-------|---------------|-------|-------|---------------------|-------|-------|--------------------|-------|-------|----------------|-------|-------|----------------|--------|-------|----------------|-------|-----------|-------------------------------------------|------------------------------------------------------|-------------------------|
|                        |                                          | Pre   | GII.2<br>Post | Ratio | Pre   | GII.3<br>Post | Ratio | Pre   | GII.4 2006b<br>Post | Ratio | Pre   | GII.4 2012<br>Post | Ratio | Pre   | GII.12<br>Post | Ratio | Pre   | GII.14<br>Post | Ratio  | Pre   | GII.17<br>Post | Ratio |           |                                           |                                                      |                         |
| 1                      | 5                                        | 199.3 | 10            | 0.05  | 10    | 10            | 1     | 10    | 291.6               | 0     | 10    | 968.4              | 96.84 | 10    | 10             | 1     | 10    | 10             | 1      | 10    | 10             | 1     | Sydney    | +                                         | +                                                    | +                       |
| 2                      | 5                                        | 10    | 10            | 1     | 10    | 10            | 1     | 10    | 225.8               | 22.58 | 10    | 755.1              | 75.51 | 10    | 10             | 1     | 10    | 10             | 1      | 10    | 10             | 1     | Sydney    | +                                         | +                                                    |                         |
| 3                      | 12                                       | 10    | 10            | 1     | 10    | 10            | 1     | 10    | 1347                | 134.7 | 10    | 6652               | 665.2 | 10    | 10             | 1     | 10    | 10             | 1      | 10    | 10             | 1     | Sydney    | +                                         | +                                                    |                         |
| 4                      | 12                                       | 10    | 10            | 1     | 10    | 10            | 1     | 10    | 95.13               | 9.513 | 10    | 669.7              | 66.97 | 10    | 10             | 1     | 10    | 10             | 1      | 10    | 10             | 1     | Sydney    | +                                         | +                                                    |                         |
| 5                      | 12                                       | 10    | 10            | 1     | 10    | 10            | 1     | 10    | 71.09               | 7.109 | 10    | 393.1              | 39.31 | 644.8 | 268.8          | 0.417 | 10    | 10             | 1      | 10    | 10             | 1     | Sydney    | +                                         | +                                                    | +                       |
| 6                      | 5                                        | 10    | 10            | 1     | 10    | 10            | 1     | 36    | 192.5               | 5.347 | 28.31 | 825.3              | 29.15 | 322.9 | 100.4          | 0.311 | 10    | 10             | 1      | 10    | 10             | 1     | Sydney    | +                                         | +                                                    | +                       |
| 7                      | 5                                        | 10    | 10            | 1     | 10    | 10            | 1     | 10    | 647.1               | 64.71 | 10    | 4294               | 429.4 | 10    | 10             | 1     | 58.41 | 10             | 0.1712 | 10    | 10             | 1     | Sydney    | +                                         | +                                                    | +                       |
| 8                      | 5                                        | 32.91 | 10            | 0.304 | 10    | 10            | 1     | 10    | 266.6               | 26.66 | 10    | 1784               | 178.4 | 10    | 10             | 1     | 10    | 10             | 1      | 10    | 10             | 1     | Sydney    | +                                         | +                                                    | +                       |
| 9                      | 5                                        | 88.94 | 10            | 0.112 | 10    | 10            | 1     | 10    | 10                  | 1     | 10    | 10                 | 1     | 10    | 786.1          | 78.61 | 10    | 10             | 1      | 10    | 10             | 1     | GII.12    | +                                         | +                                                    | +                       |
| 10                     | 5                                        | 173.1 | 10            | 0.058 | 32.08 | 10            | 0.312 | 76.52 | 10                  | 0.131 | 34.24 | 10                 | 0.292 | 22.43 | 597.7          | 26.65 | 101.3 | 10             | 0.0987 | 27.71 | 10             | 0.361 | GII.12    | +                                         | +                                                    | +                       |
| 11                     | 2                                        | 74.48 | 10            | 0.134 | 10    | 10            | 1     | 573.1 | 10                  | 0.017 | 253.1 | 10                 | 0.04  | 42.56 | 1455           | 34.19 | 37.22 | 10             | 0.2687 | 10    | 10             | 1     | GII.12    | +                                         | +                                                    | +                       |
| 12                     | 12                                       | 10    | 10            | 1     | 10    | 10            | 1     | 10    | 10                  | 1     | 10    | 10                 | 1     | 10    | 10             | 1     | 10    | 10             | 1      | 10    | 10             | 1     | GI.3      |                                           |                                                      |                         |
| 13                     | 12                                       | 10    | 10            | 1     | 10    | 10            | 1     | 251.1 | 124.9               | 0.497 | 499.1 | 217.7              | 0.436 | 10    | 10             | 1     | 10    | 10             | 1      | 2253  | 601.9          | 0.267 | GI.5 plus |                                           |                                                      | +                       |
| 14                     | 12                                       | 10    | 10            | 1     | 10    | 10            | 1     | 10    | 10                  | 1     | 10    | 10                 | 1     | 10    | 10             | 1     | 10    | 10             | 1      | 10    | 10             | 1     | GI.5      |                                           |                                                      |                         |
| 15                     | 1                                        | 10    | 333.5         | 33.35 | 10    | 75.36         | 7.536 | 10    | 422                 | 42.2  | 10    | 604.7              | 60.47 | 10    | 1323           | 132.3 | 10    | 39.96          | 3.996  | 10    | 92.09          | 9.209 | Sydney    | +                                         |                                                      |                         |
| 16                     | 5                                        | 10    | 64.03         | 6.403 | 10    | 10            | 1     | 10    | 463                 | 46.3  | 10    | 860.2              | 86.02 | 10    | 1305           | 130.5 | 10    | 10             | 1      | 10    | 10             | 1     | Sydney    | +                                         |                                                      |                         |
| 17                     | 5                                        | 10    | 45.88         | 4.588 | 10    | 294           | 29.4  | 10    | 109.8               | 10.98 | 10    | 422.4              | 42.24 | 10    | 188.6          | 18.86 | 10    | 10             | 1      | 10    | 32.63          | 3.263 | Sydney    | +                                         |                                                      |                         |
| 18                     | 5                                        | 204.7 | 92.66         | 0.453 | 54.47 | 10            | 0.184 | 32.11 | 883.2               | 27.51 | 28.1  | 1030               | 36.65 | 10    | 1149           | 114.9 | 10    | 10             | 1      | 10    | 10             | 1     | Sydney    | +                                         |                                                      | +                       |
| 19                     | 5                                        | 10    | 10            | 1     | 10    | 10            | 1     | 10    | 362.9               | 36.29 | 10    | 2407               | 240.7 | 10    | 564.6          | 56.46 | 10    | 10             | 1      | 10    | 10             | 1     | GII.12    | +                                         | +                                                    |                         |
| 20                     | 1.5                                      | 10    | 10            | 1     | 10    | 10            | 1     | 10    | 244.9               | 24.49 | 10    | 1581               | 158.1 | 10    | 972.8          | 97.28 | 10    | 10             | 1      | 10    | 10             | 1     | GII.12    | +                                         |                                                      |                         |
| 21                     | 5                                        | 10    | 46.96         | 4.696 | 10    | 10            | 1     | 10    | 747.2               | 74.72 | 10    | 1174               | 117.4 | 10    | 10             | 1     | 10    | 281.1          | 28.11  | 10    | 10             | 1     | Sydney    | +                                         |                                                      |                         |
| 22                     | 5                                        | 81.02 | 10            | 0.123 | 10    | 10            | 1     | 58.09 | 43.58               | 0.75  | 10    | 28.86              | 2.886 | 10    | 10             | 1     | 10    | 10             | 1      | 10    | 10             | 1     | GI.3      |                                           |                                                      | +                       |
| 23                     | 1.5                                      | 10    | 30.86         | 3.086 | 10    | 10            | 1     | 56    | 10                  | 0.179 | 10    | 10                 | 1     | 10    | 172.4          | 17.24 | 10    | 10             | 1      | 10    | 10             | 1     | GI.5      |                                           |                                                      | +                       |
| 24                     | 12                                       | 10    | 10            | 1     | 10    | 10            | 1     | 10    | 164.2               | 16.42 | 10    | 968.4              | 96.84 | 528.8 | 709.3          | 1.341 | 10    | 10             | 1      | 10    | 10             | 1     | Sydney    | +                                         |                                                      | +                       |
| 25                     | 1.5                                      | 10    | 10            | 1     | 10    | 206.2         | 20.62 | 10    | 279.4               | 27.94 | 10    | 2405               | 240.5 | 1162  | 1600           | 1.377 | 10    | 10             | 1      | 10    | 10             | 1     | Sydney    | +                                         |                                                      | +                       |
| 26                     | 5                                        | 91.03 | 34.55         | 0.38  | 29.72 | 10            | 0.336 | 10    | 109.5               | 10.95 | 10    | 496.1              | 49.61 | 10    | 445.3          | 44.53 | 10    | 10             | 1      | 10    | 10             | 1     | GI.3      |                                           |                                                      | +                       |

20 of 22 12 of 22 15 of 26 Totals

- A.  Single seroconversion to GII.4  Single seroconversion to GII.12  Seroconversion to GII.4 and GII.12
-  Seroconversion to GII.4 and another GII (not GII.12)  No GII seroconversions
- B.  Pre-infection titer > limit of detection
- C.  Post/pre ID50 ratio > 4

**Table S2. Summary metrics to genogroup I human norovirus strains among the child cohort.**

| A              | B                            |      |      |       | C    |       |       |      |      |       |      |       |       |      |      |       |      |      |        | Seroconverted |                       |                              |       | Serology matches | Pre infection |        |
|----------------|------------------------------|------|------|-------|------|-------|-------|------|------|-------|------|-------|-------|------|------|-------|------|------|--------|---------------|-----------------------|------------------------------|-------|------------------|---------------|--------|
| Subject number | Age at pre-blood draw months | GI.1 |      |       | GI.3 |       |       | GI.4 |      |       | GI.5 |       |       | GI.6 |      |       | GI.7 |      |        | RT-qPCR       | to infecting genotype | asymptomatic-symptomatic PCR | titer |                  |               |        |
|                |                              | Pre  | Post | Ratio | Pre  | Post  | Ratio | Pre  | Post | Ratio | Pre  | Post  | Ratio | Pre  | Post | Ratio | Pre  | Post | Ratio  |               |                       |                              |       |                  |               |        |
| 1              | 5                            | 28   | 61.9 | 2.21  | 10   | 10    | 1     | 10   | 10   | 1     | 20.8 | 10    | 0.48  | 10   | 10   | 1     | 10   | 10   | 1      | Sydney        |                       |                              | +     |                  |               |        |
| 2              | 5                            | 10   | 10   | 1     | 10   | 10    | 1     | 10   | 10   | 1     | 10   | 10    | 1     | 10   | 10   | 1     | 10   | 10   | 1      | Sydney        |                       |                              |       |                  |               |        |
| 3              | 12                           | 10   | 10   | 1     | 10   | 10    | 1     | 10   | 10   | 1     | 10   | 10    | 1     | 10   | 10   | 1     | 10   | 10   | 1      | Sydney        |                       |                              |       |                  |               |        |
| 4              | 12                           | 10   | 10   | 1     | 10   | 10    | 1     | 10   | 10   | 1     | 10   | 10    | 1     | 10   | 10   | 1     | 10   | 10   | 1      | Sydney        |                       |                              |       |                  |               |        |
| 5              | 12                           | 10   | 10   | 1     | 10   | 10    | 1     | 10   | 10   | 1     | 10   | 10    | 1     | 10   | 10   | 1     | 10   | 10   | 1      | Sydney        |                       |                              |       |                  |               |        |
| 6              | 5                            | 88.9 | 31.1 | 0.35  | 10   | 10    | 1     | 73.2 | 10   | 0.14  | 68.6 | 10    | 0.15  | 10   | 10   | 1     | 34.5 | 10   | 0.29   | Sydney        |                       |                              | +     |                  |               |        |
| 7              | 5                            | 10   | 10   | 1     | 10   | 10    | 1     | 380  | 295  | 0.78  | 10   | 10    | 1     | 10   | 10   | 1     | 10   | 10   | 1      | Sydney        |                       |                              | +     |                  |               |        |
| 8              | 5                            | 10   | 10   | 1     | 10   | 10    | 1     | 10   | 10   | 1     | 10   | 10    | 1     | 10   | 10   | 1     | 10   | 10   | 1      | Sydney        |                       |                              |       |                  |               |        |
| 9              | 5                            | 10   | 10   | 1     | 10   | 10    | 1     | 10   | 10   | 1     | 10   | 10    | 1     | 10   | 10   | 1     | 10   | 10   | 1      | GI.12         |                       |                              |       |                  |               |        |
| 10             | 5                            | 100  | 10   | 0.1   | 118  | 10    | 0.08  | 22.9 | 10   | 0.44  | 98.2 | 10    | 0.1   | 10   | 10   | 1     | 39   | 10   | 0.2566 | GI.12         |                       |                              | +     |                  |               |        |
| 11             | 2                            | 32.5 | 10   | 0.31  | 10   | 10    | 1     | 10   | 10   | 1     | 44   | 10    | 0.23  | 10   | 10   | 1     | 10   | 10   | 1      | GI.12         |                       |                              | +     |                  |               |        |
| 12             | 12                           | 10   | 23.9 | 2.39  | 10   | 1068  | 107   | 10   | 10   | 1     | 10   | 10    | 1     | 10   | 10   | 1     | 10   | 10   | 1      | GI.3          | +                     | +                            |       |                  |               |        |
| 13             | 12                           | 10   | 10   | 1     | 10   | 745.8 | 74.6  | 10   | 10   | 1     | 10   | 10    | 1     | 10   | 10   | 1     | 10   | 10   | 1      | GI.5 +        |                       |                              |       |                  |               |        |
| 14             | 12                           | 10   | 10   | 1     | 10   | 10    | 1     | 10   | 10   | 1     | 10   | 678.2 | 67.8  | 10   | 10   | 1     | 10   | 10   | 1      | GI.5          | +                     | +                            |       |                  |               |        |
| 15             | 1                            | 10   | 10   | 1     | 10   | 10    | 1     | 10   | 10   | 1     | 10   | 10    | 1     | 10   | 10   | 1     | 10   | 10   | 1      | Sydney        |                       |                              |       |                  |               |        |
| 16             | 5                            | 10   | 10   | 1     | 10   | 10    | 1     | 10   | 10   | 1     | 10   | 10    | 1     | 10   | 10   | 1     | 10   | 10   | 1      | Sydney        |                       |                              |       |                  |               |        |
| 17             | 5                            | 10   | 10   | 1     | 10   | 10    | 1     | 10   | 10   | 1     | 10   | 10    | 1     | 10   | 10   | 1     | 10   | 10   | 1      | Sydney        |                       |                              |       |                  |               |        |
| 18             | 5                            | 65.1 | 33.8 | 0.52  | 10   | 10    | 1     | 10   | 10   | 1     | 68.9 | 10    | 0.15  | 10   | 10   | 1     | 51.1 | 10   | 0.1957 | Sydney        |                       |                              | +     |                  |               |        |
| 19             | 5                            | 10   | 10   | 1     | 10   | 10    | 1     | 10   | 10   | 1     | 10   | 10    | 1     | 10   | 10   | 1     | 10   | 10   | 1      | GI.12         |                       |                              |       |                  |               |        |
| 20             | 1.5                          | 168  | 56.4 | 0.34  | 10   | 10    | 1     | 10   | 10   | 1     | 64.7 | 23.78 | 0.37  | 10   | 10   | 1     | 31   | 10   | 0.3225 | GI.12         |                       |                              | +     |                  |               |        |
| 21             | 5                            | 10   | 10   | 1     | 10   | 10    | 1     | 10   | 10   | 1     | 10   | 10    | 1     | 10   | 10   | 1     | 10   | 10   | 1      | Sydney        |                       |                              |       |                  |               |        |
| 22             | 5                            | 10   | 219  | 21.9  | 10   | 375.6 | 37.6  | 10   | 72.3 | 7.23  | 10   | 164.1 | 16.4  | 10   | 59.6 | 5.96  | 10   | 10   | 1      | GI.3          | +                     |                              |       |                  |               |        |
| 23             | 1.5                          | 126  | 10   | 0.08  | 71.6 | 1411  | 19.7  | 10   | 10   | 1     | 68.7 | 826.3 | 12    | 10   | 10   | 1     | 202  | 10   | 0.0496 | GI.5          | +                     | +                            | +     |                  |               |        |
| 24             | 12                           | 10   | 10   | 1     | 10   | 10    | 1     | 10   | 122  | 12.2  | 10   | 1614  | 161   | 10   | 72.2 | 7.22  | 10   | 10   | 1      | Sydney        |                       |                              |       |                  |               |        |
| 25             | 1.5                          | 10   | 405  | 40.5  | 10   | 10    | 1     | 10   | 10   | 1     | 10   | 10    | 1     | 10   | 10   | 1     | 10   | 10   | 1      | Sydney        |                       |                              |       |                  |               |        |
| 26             | 5                            | 10   | 10   | 1     | 10   | 1003  | 100   | 10   | 10   | 1     | 10   | 1361  | 136   | 10   | 10   | 1     | 10   | 10   | 1      | GI.3          | +                     |                              |       |                  |               |        |
|                |                              |      |      |       |      |       |       |      |      |       |      |       |       |      |      |       |      |      |        | 5 of 8        |                       | 3 of 8                       |       | 8 Of 26          |               | Totals |

A  No GI seroconversions  Single seroconversion to GI.3  Single seroconversion to GI.5

 GI.3 and GI.5 seroconversions  GI.5 and other GI seroconversion  Single seroconversion to GI.1

B  Pre infection titer > limit of detection (1:20 dilution)

C  Post/pre ID50 ratio > 4
